# Supplementary material for: AVRA: Automatic visual ratings of atrophy from MRI images using recurrent convolutional neural networks
Source: PubMed Central journal article supplement (PMC6545397; doi:10.1016/j.nicl.2019.101872), 2019-05-25
Supplement: mmc1.pdf [file mmc1.pdf]

# Supplementary Data - AVRA: Automatic Visual Ratings of Atrophy from MRI images using Recurrent Convolutional Neural Networks.

Gustav Mårtensson<sup>a,\*</sup>, Daniel Ferreira<sup>a</sup>, Lena Cavallin<sup>b,c</sup>, J-Sebastian Muehlboeck<sup>a</sup>, Lars-Olof Wahlund<sup>a</sup>, Chunliang Wang<sup>d</sup>, Eric Westman<sup>a,e</sup>, for the Alzheimer’s Disease Neuroimaging Initiative <sup>☆</sup>

<sup>a</sup>Division of Clinical Geriatrics, Department of Neurobiology, Care Sciences and Society, Karolinska Institutet, Stockholm, Sweden.

<sup>b</sup>Department of Clinical Neuroscience, Karolinska Institutet, Stockholm, Sweden.

<sup>c</sup>Department of Radiology, Karolinska University Hospital, Stockholm, Sweden.

<sup>d</sup>School of Technology and Health, KTH Royal Institute of Technology, Stockholm, Sweden.

<sup>e</sup>Department of Neuroimaging, Centre for Neuroimaging Sciences, Institute of Psychiatry, Psychology and Neuroscience, King’s College London, London, UK.

---

---

## 1. MRI scanning protocols

Table 1 provides a summary of the MRI protocols used for the images in this project. Table 2 and 3 shows a detailed table of each individual scanner and the scanning parameters used to acquire the images for the MemClin and ADNI cohort, respectively.

Table 1: Summary statistics of the two cohorts used in the project, stratified by field strength. The entries shows the minimum and maximum values in each column as "min - max". Abbreviations: Field strength (FS); Echo time (TE); Repetition time (TR); Inversion recovery time (IT); Slice thickness (ST).

| Cohort: FS    | N    | TE (ms)     | TR (ms)         | IT (ms)      | ST (mm)   |
|---------------|------|-------------|-----------------|--------------|-----------|
| ADNI: 1.5T    | 3996 | 2.88 - 4.96 | 8.51 - 3000     | 1000         | 1.2       |
| MemClin: 1.5T | 327  | 2.56 - 4.4  | 11.4 - 2400     | 300 - 1100.0 | 1.2 - 2.5 |
| ADNI: 3.0T    | 837  | 2.84 - 3.25 | 6.39 - 2300.0   | 0.0 - 1000.0 | 1.2       |
| MemClin: 3.0T | 57   | 2.57 - 3.42 | 1780.0 - 2300.0 | 900.0        | 1.0 - 1.4 |

Table 2: Detailed MRI protocols from MemClin cohort, where each row represent an individual scanner. Abbreviations: Echo time (TE); Repetition time (TR); Inversion recovery time (IT); Slice thickness (ST); Resolution in x-y-plane (x-y, equal lengths).

| Scanner                 | N   | FS (T) | TE (ms)     | TR (ms)     | IT (ms)    | x-y (mm)    | ST (mm)     |
|-------------------------|-----|--------|-------------|-------------|------------|-------------|-------------|
| Siemens Aera            | 2   | 1.5    | 3.18        | 2300        | 904        | 1.25        | 1.20        |
| Siemens Avanto          | 204 | 1.5    | 2.56 - 4.19 | 1160 - 2400 | 600 - 1100 | 0.45 - 1.30 | 1.20 - 2.50 |
| Siemens Magnetom vision | 36  | 1.5    | 4.40        | 11.40       | 300        | 0.90        | 2.50 - 2.50 |
| Siemens Symphony        | 85  | 1.5    | 3.93        | 1960        | 790 - 875  | 0.49        | 1.41 - 1.51 |
| Siemens Triotim         | 57  | 3.0    | 2.57 - 3.42 | 1780 - 2300 | 900        | 0.85 - 1    | 1 - 1.40    |

---

<sup>☆</sup>Data used in preparation of this article were obtained from the Alzheimer’s Disease Neuroimaging Initiative (ADNI) database (adni.loni.usc.edu). As such, the investigators within the ADNI contributed to the design and implementation of ADNI and/or provided data but did not participate in analysis or writing of this report. A complete listing of ADNI investigators can be found at: [http://adni.loni.usc.edu/wp-content/uploads/how\\_to\\_apply/ADNI\\_Acknowledgement\\_List.pdf](http://adni.loni.usc.edu/wp-content/uploads/how_to_apply/ADNI_Acknowledgement_List.pdf).

\*Corresponding author

Email address: [gustav.martensson@ki.se](mailto:gustav.martensson@ki.se) (Gustav Mårtensson)

Table 3: Detailed MRI protocols from ADNI cohort, where each row represent an individual scanner. Abbreviations: Echo time (TE); Repetition time (TR); Inversion recovery time (IT); Slice thickness (ST); Resolution in x-y-plane (x-y).

| Scanner          | N   | FS (T) | TE (ms)     | TR (ms)      | IT (ms)     | x-y (mm)    | ST (mm) |
|------------------|-----|--------|-------------|--------------|-------------|-------------|---------|
| GE Genesis signa | 114 | 1.5    | 4.10        | 10.20        | 1000        | 0.94        | 1.20    |
| GE Genesis signa | 16  | 1.5    | 4.08 - 4.10 | 10.20        | 1000        | 0.94 - 1.02 | 1.20    |
| GE Genesis signa | 18  | 1.5    | 4.09        | 10.40        | 1000        | 0.94        | 1.20    |
| GE Genesis signa | 39  | 3      | 3.05        | 7.50         | 900         | 1.02        | 1.20    |
| GE Genesis signa | 4   | 1.5    | 4.09        | 10.20        | 1000        | 0.94        | 1.20    |
| GE Genesis signa | 48  | 1.5    | 4.08 - 4.10 | 10.20        | 1000        | 0.94 - 1.09 | 1.20    |
| GE Genesis signa | 89  | 1.5    | 4.09        | 10.40        | 1000        | 0.94        | 1.20    |
| GE Signa excite  | 10  | 3.0    | 2.84 - 2.85 | 6.61 - 6.63  | 900         | 1.02        | 1.20    |
| GE Signa excite  | 107 | 1.5    | 3.92 - 4.05 | 8.90 - 9.20  | 1000        | 0.94 - 1.02 | 1.20    |
| GE Signa excite  | 14  | 1.5    | 3.80 - 3.90 | 8.59 - 8.81  | 1000        | 0.94        | 1.20    |
| GE Signa excite  | 155 | 1.5    | 3.80 - 3.92 | 8.59 - 8.99  | 1000        | 0.94 - 0.98 | 1.20    |
| GE Signa excite  | 158 | 1.5    | 3.92 - 4.05 | 8.92 - 9.20  | 1000        | 0.94        | 1.20    |
| GE Signa excite  | 17  | 1.5    | 3.96        | 9.12         | 1000        | 0.94        | 1.20    |
| GE Signa excite  | 2   | 1.5    | 3.96        | 9.12         | 1000        | 0.94        | 1.20    |
| GE Signa excite  | 21  | 1.5    | 3.80        | 8.59         | 1000        | 0.94        | 1.20    |
| GE Signa excite  | 24  | 3.0    | 2.84 - 2.85 | 6.62 - 6.63  | 900         | 1.02        | 1.20    |
| GE Signa excite  | 30  | 1.5    | 3.92 - 4.06 | 8.92 - 9.22  | 1000        | 0.94        | 1.20    |
| GE Signa excite  | 34  | 3.0    | 2.84 - 2.99 | 6.61 - 7.04  | 900         | 1.02        | 1.20    |
| GE Signa excite  | 39  | 1.5    | 3.80 - 3.91 | 8.60 - 8.84  | 1000        | 0.94        | 1.20    |
| GE Signa excite  | 45  | 1.5    | 3.96        | 9.12         | 1000        | 0.94        | 1.20    |
| GE Signa excite  | 46  | 1.5    | 3.80 - 3.90 | 8.59 - 8.81  | 1000        | 0.94        | 1.20    |
| GE Signa excite  | 51  | 1.5    | 3.92 - 4.05 | 8.92 - 9.20  | 1000        | 0.94        | 1.20    |
| GE Signa excite  | 52  | 1.5    | 3.92 - 3.94 | 8.92 - 8.94  | 1000        | 0.94        | 1.20    |
| GE Signa excite  | 56  | 1.5    | 3.78 - 3.98 | 8.56 - 9.12  | 1000        | 0.94 - 1.02 | 1.20    |
| GE Signa excite  | 60  | 1.5    | 3.79 - 3.91 | 8.58 - 8.84  | 1000        | 0.94 - 1.02 | 1.20    |
| GE Signa excite  | 8   | 3.0    | 2.86 - 3.01 | 6.64 - 6.96  | 900         | 1.02        | 1.20    |
| GE Signa excite  | 84  | 1.5    | 3.92 - 3.96 | 8.92 - 9.12  | 1000        | 0.94        | 1.20    |
| GE Signa excite  | 88  | 1.5    | 3.80 - 3.90 | 8.59 - 8.81  | 1000        | 0.94        | 1.20    |
| GE Signa excite  | 9   | 3.0    | 2.84 - 2.99 | 6.62 - 6.91  | 900         | 1.02        | 1.20    |
| GE Signa excite  | 93  | 1.5    | 3.96        | 9.12         | 1000        | 0.94        | 1.20    |
| GE Signa excite  | 95  | 1.5    | 3.78 - 3.91 | 8.57 - 8.84  | 1000        | 0.94        | 1.20    |
| GE Signa hdx     | 10  | 3.0    | 2.84 - 2.85 | 6.61 - 6.63  | 900         | 1.02        | 1.20    |
| GE Signa hdx     | 106 | 1.5    | 3.80        | 8.59         | 1000        | 0.94        | 1.20    |
| GE Signa hdx     | 149 | 1.5    | 3.79 - 4.96 | 8.58 - 11.05 | 1000 - 1044 | 0.94 - 1.09 | 1.20    |
| GE Signa hdx     | 16  | 1.5    | 3.80 - 3.90 | 8.59 - 8.81  | 1000        | 0.94        | 1.20    |
| GE Signa hdx     | 20  | 1.5    | 3.80 - 3.90 | 8.59 - 8.81  | 1000        | 0.94        | 1.20    |
| GE Signa hdx     | 24  | 1.5    | 3.92        | 8.92         | 1000        | 0.94        | 1.20    |
| GE Signa hdx     | 25  | 1.5    | 4.04        | 9.18         | 1000        | 0.94        | 1.20    |
| GE Signa hdx     | 50  | 1.5    | 3.80        | 8.59         | 1000        | 0.94        | 1.20    |
| GE Signa hdx     | 6   | 1.5    | 3.80        | 8.59         | 1000        | 0.94        | 1.20    |
| GE Signa hdx     | 92  | 1.5    | 3.80 - 3.92 | 8.59 - 8.99  | 1000        | 0.94        | 1.20    |
| GE Signa hdx     | 92  | 1.5    | 3.97 - 4.05 | 9 - 9.20     | 1000        | 0.94        | 1.20    |
| GE Signa hdx     | 2   | 1.5    | 3.80        | 8.60         | 1000        | 0.94        | 1.20    |
| GE Signa hdx     | 6   | 3.0    | 2.84 - 2.85 | 6.61 - 6.63  | 900         | 1.02        | 1.20    |
| Philips Achieva  | 12  | 3.0    | 3.05 - 3.17 | 6.39 - 6.81  | 1000        | 1.00        | 1.20    |
| Philips Achieva  | 24  | 3.0    | 3.25        | 6.85         | 1000        | 1.00        | 1.20    |
| Philips Achieva  | 35  | 3.0    | 3.13 - 3.25 | 6.78 - 6.85  | 1000        | 1.00        | 1.20    |
| Philips Achieva  | 65  | 1.5    | 4 - 4.01    | 8.62         | 1000        | 0.90 - 0.98 | 1.20    |
| Philips Intera   | 10  | 3.0    | 3.16        | 6.80         | 0 - 1000    | 1.00        | 1.20    |
| Philips Intera   | 17  | 3.0    | 3.16 - 3.18 | 6.80 - 6.92  | 0 - 1000    | 1.00        | 1.20    |
| Philips Intera   | 2   | 3.0    | 3.16        | 6.80         | 0           | 1.00        | 1.20    |
| Philips Intera   | 26  | 3.0    | 3.13 - 3.25 | 6.76 - 6.84  | 1000        | 1.00        | 1.20    |
| Philips Intera   | 34  | 1.5    | 3.99 - 4.01 | 8.58 - 8.62  | 0 - 1000    | 0.94 - 0.98 | 1.20    |
| Philips Intera   | 38  | 1.5    | 4           | 8.62         | 0 - 1000    | 0.94        | 1.20    |
| Philips Intera   | 4   | 1.5    | 4           | 8.62         | 1000        | 0.94        | 1.20    |
| Philips Intera   | 4   | 3.0    | 3.16        | 6.80 - 6.81  | 1000        | 1.00        | 1.20    |

|                         |     |     |             |             |      |             |      |
|-------------------------|-----|-----|-------------|-------------|------|-------------|------|
| Philips Intera          | 40  | 1.5 | 3.98 - 4.01 | 8.51 - 8.62 | 1000 | 0.94        | 1.20 |
| Philips Intera          | 48  | 3.0 | 3.16        | 6.80 - 6.81 | 1000 | 1.00        | 1.20 |
| Philips Intera          | 54  | 1.5 | 3.99 - 4.01 | 8.51 - 8.63 | 1000 | 0.94 - 0.98 | 1.20 |
| Philips Intera          | 6   | 1.5 | 4 - 4.01    | 8.61        | 1000 | 0.94        | 1.20 |
| Philips Intera          | 6   | 3.0 | 3.13 - 3.25 | 6.76 - 6.84 | 1000 | 1.00        | 1.20 |
| Philips Intera          | 61  | 1.5 | 4           | 8.61 - 8.62 | 1000 | 0.94        | 1.20 |
| Philips Intera          | 66  | 1.5 | 4           | 8.59 - 8.61 | 1000 | 0.94        | 1.20 |
| Philips Intera achievea | 4   | 1.5 | 3.98        | 8.55        | 1000 | 0.94        | 1.20 |
| Siemens Allegra         | 12  | 2.9 | 2.91        | 2300        | 900  | 1.00        | 1.20 |
| Siemens Allegra         | 54  | 2.9 | 2.91        | 2300        | 900  | 1.00        | 1.20 |
| Siemens Allegra         | 72  | 2.9 | 2.91        | 2300        | 900  | 1.00        | 1.20 |
| Siemens Avanto          | 109 | 1.5 | 3.50        | 2400        | 1000 | 1.25        | 1.20 |
| Siemens Avanto          | 30  | 1.5 | 3.50        | 2400        | 1000 | 1.25        | 1.20 |
| Siemens Avanto          | 30  | 1.5 | 3.52 - 3.54 | 2400        | 1000 | 1.25 - 1.30 | 1.20 |
| Siemens Avanto          | 4   | 1.5 | 3.50        | 2400        | 1000 | 1.25        | 1.20 |
| Siemens Avanto          | 44  | 1.5 | 3.50        | 2400        | 1000 | 1.25        | 1.20 |
| Siemens Avanto          | 52  | 1.5 | 3.52 - 3.54 | 2400        | 1000 | 1.25 - 1.30 | 1.20 |
| Siemens Avanto          | 63  | 1.5 | 3.50        | 2400        | 1000 | 1.25        | 1.20 |
| Siemens Espree          | 8   | 1.5 | 3.59        | 2400        | 1000 | 1.25        | 1.20 |
| Siemens Sonata          | 116 | 1.5 | 3.54        | 2400        | 1000 | 1.25        | 1.20 |
| Siemens Sonata          | 117 | 1.5 | 3.54        | 2400        | 1000 | 1.25        | 1.20 |
| Siemens Sonata          | 63  | 1.5 | 3.54        | 3000        | 1000 | 1.25        | 1.20 |
| Siemens Sonata          | 72  | 1.5 | 3.54        | 3000        | 1000 | 1.25        | 1.20 |
| Siemens Sonata          | 77  | 1.5 | 3.54 - 3.55 | 3000        | 1000 | 1.25        | 1.20 |
| Siemens Sonatavision    | 2   | 1.5 | 3.57        | 3000        | 1000 | 1.25        | 1.20 |
| Siemens Sonatavision    | 30  | 1.5 | 3.54        | 2400        | 1000 | 1.25        | 1.20 |
| Siemens Symphony        | 100 | 1.5 | 3.61        | 3000        | 1000 | 1.25        | 1.20 |
| Siemens Symphony        | 104 | 1.5 | 3.61 - 3.67 | 3000        | 1000 | 1.25        | 1.20 |
| Siemens Symphony        | 2   | 1.5 | 3.61        | 3000        | 1000 | 1.25        | 1.20 |
| Siemens Symphony        | 20  | 1.5 | 3.61        | 3000        | 1000 | 1.25        | 1.20 |
| Siemens Symphony        | 29  | 1.5 | 3.61        | 3000        | 1000 | 1.25        | 1.20 |
| Siemens Symphony        | 30  | 1.5 | 3.67 - 3.71 | 3000        | 1000 | 1.25 - 1.35 | 1.20 |
| Siemens Symphony        | 58  | 1.5 | 3.61 - 3.79 | 3000        | 1000 | 1.25 - 1.35 | 1.20 |
| Siemens Symphony        | 81  | 1.5 | 2.88 - 3.65 | 3000        | 1000 | 1.25        | 1.20 |
| Siemens Symphony        | 92  | 1.5 | 3.87        | 3000        | 1000 | 1.25        | 1.20 |
| Siemens Symphony        | 97  | 1.5 | 3.59 - 3.63 | 3000        | 1000 | 1.25 - 1.30 | 1.20 |
| Siemens Symphonytim     | 110 | 1.5 | 3.64        | 3000        | 1000 | 1.25        | 1.20 |
| Siemens Trio            | 140 | 3.0 | 2.94        | 2300        | 900  | 1.00        | 1.20 |
| Siemens Trio            | 4   | 2.9 | 2.94        | 2300        | 900  | 1.00        | 1.20 |
| Siemens Trio            | 44  | 2.9 | 2.94        | 2300        | 900  | 1.00        | 1.20 |
| Siemens Trio            | 5   | 3.0 | 2.94        | 2300        | 900  | 1.00        | 1.20 |
| Siemens Trio            | 55  | 2.9 | 2.94        | 2300        | 900  | 1.00        | 1.20 |
| Siemens Trio            | 6   | 2.9 | 2.94        | 2300        | 900  | 1.00        | 1.20 |
| Siemens Trio            | 6   | 2.9 | 2.94        | 2300        | 900  | 1.00        | 1.20 |
| Siemens Trio            | 6   | 3.0 | 2.96        | 2300        | 900  | 1.00        | 1.20 |
| Siemens Trio            | 9   | 3.0 | 2.94        | 2300        | 900  | 1.00        | 1.20 |
| Siemens Triotim         | 12  | 3.0 | 2.86 - 2.91 | 2300        | 900  | 1.00 - 1.03 | 1.20 |
| Siemens Triotim         | 12  | 3.0 | 2.91        | 2300        | 900  | 1.00        | 1.20 |
| Siemens Triotim         | 13  | 3.0 | 2.91        | 2300        | 900  | 1.00        | 1.20 |
| Siemens Triotim         | 15  | 3.0 | 2.86 - 2.91 | 2300        | 900  | 1.00        | 1.20 |
| Siemens Triotim         | 16  | 3.0 | 2.91        | 2300        | 900  | 1.00        | 1.20 |
| Siemens Triotim         | 2   | 3.0 | 2.91        | 2300        | 900  | 1.00        | 1.20 |
| Siemens Triotim         | 2   | 3.0 | 2.91        | 2300        | 900  | 1.00        | 1.20 |
| Siemens Triotim         | 2   | 3.0 | 2.91        | 2300        | 900  | 1.00        | 1.20 |
| Siemens Triotim         | 22  | 3.0 | 2.86 - 2.91 | 2300        | 900  | 1.00        | 1.20 |
| Siemens Triotim         | 4   | 3.0 | 2.91        | 2300        | 900  | 1.00        | 1.20 |
